# Supplementary material for: Design of a bipolar organic small-molecule cathode with mesoporous nanospheres structure for long lifespan and high-rate Li-storage performance
Source: Royal Society of Chemistry journal article supplement (doi:10.1039/d3sc05843c), 2023-12-07
Supplement: d3sc05843c1.pdf [file d3sc05843c1.pdf]

## Electronic Supplementary Information

### **Design of a bipolar organic small-molecule cathode with mesoporous nanospheres structure for long lifespan and high-rate Li-storage performance**

Simin Wang,<sup>‡a</sup> Qifei Guo,<sup>‡b</sup> Haoran Liu,<sup>a</sup> Longhai Zhang,<sup>a</sup> Chaofeng Zhang,<sup>a</sup> Tengfei Zhou,<sup>a</sup> Quanwei Ma,<sup>a</sup> Hongbao Li,<sup>\*a</sup> Rui Wang,<sup>a</sup> and Yang Zheng<sup>\*b</sup>

<sup>a</sup>Institutes of Physical Science and Information Technology, Leibniz International Joint Research Center of Materials Sciences of Anhui Province, Anhui Province Key Laboratory of Environment-Friendly Polymer Materials, Key Laboratory of Structure and Functional Regulation of Hybrid Material (Ministry of Education), Anhui University, Hefei 230601, China.

<sup>b</sup>The State Key Laboratory of Refractories and Metallurgy, Institute of Advanced Materials and Nanotechnology, Wuhan University of Science and Technology, Wuhan 430081, China

\*Corresponding Authors: Hongbao Li (lihb@ahu.edu.cn), Yang Zheng (yzheng@wust.edu.cn)

‡ These authors contributed equally to this work.

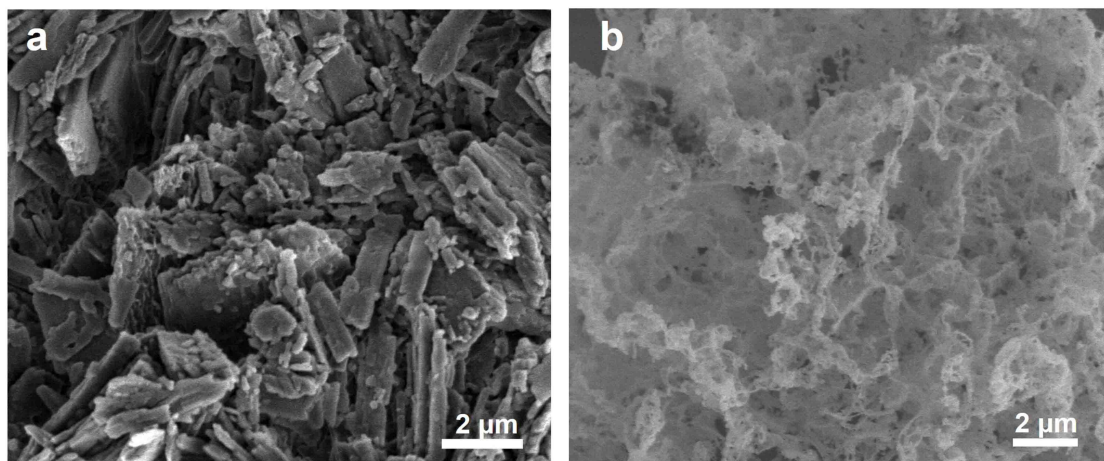

**Figure S1.** SEM images of (a) PPD and (b) FCA.

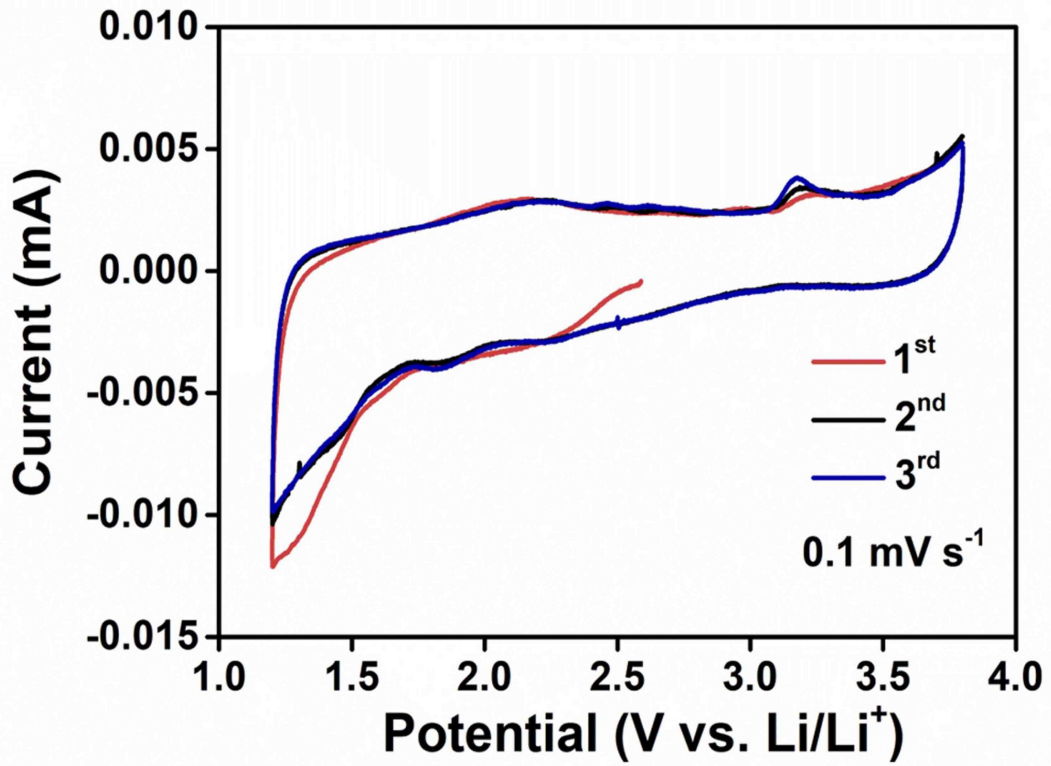

**Figure S2.** CV curves of the initial three cycles of the FCPD cathode at  $0.1 \text{ mV s}^{-1}$ .

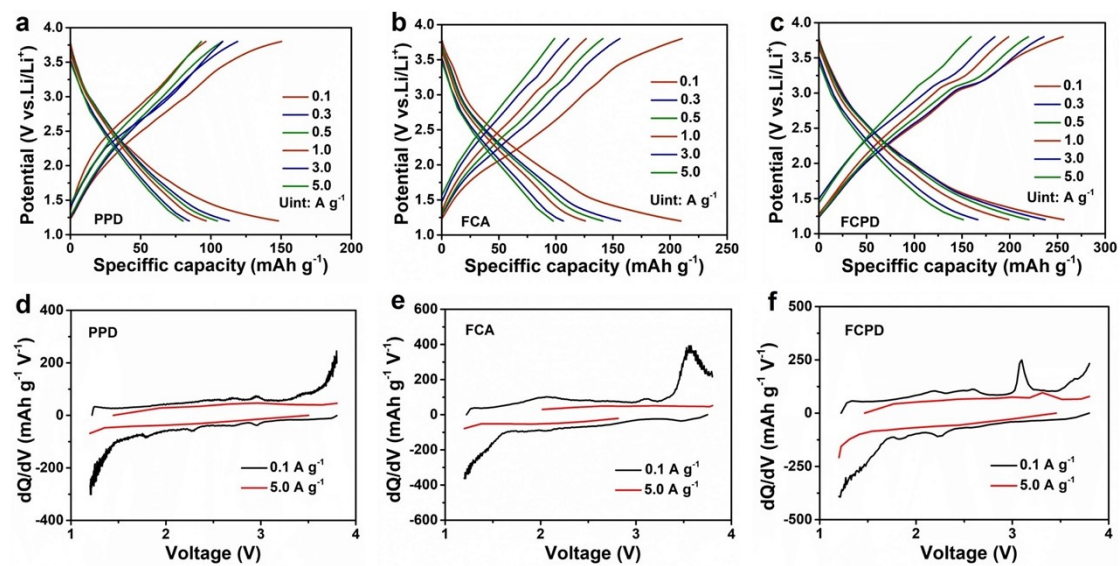

**Figure S3.** Charge/discharge profiles of PPD, FCA, and FCPD at different current densities, and corresponding dQ/dV profiles at 0.1 and 5.0 A g<sup>-1</sup>.

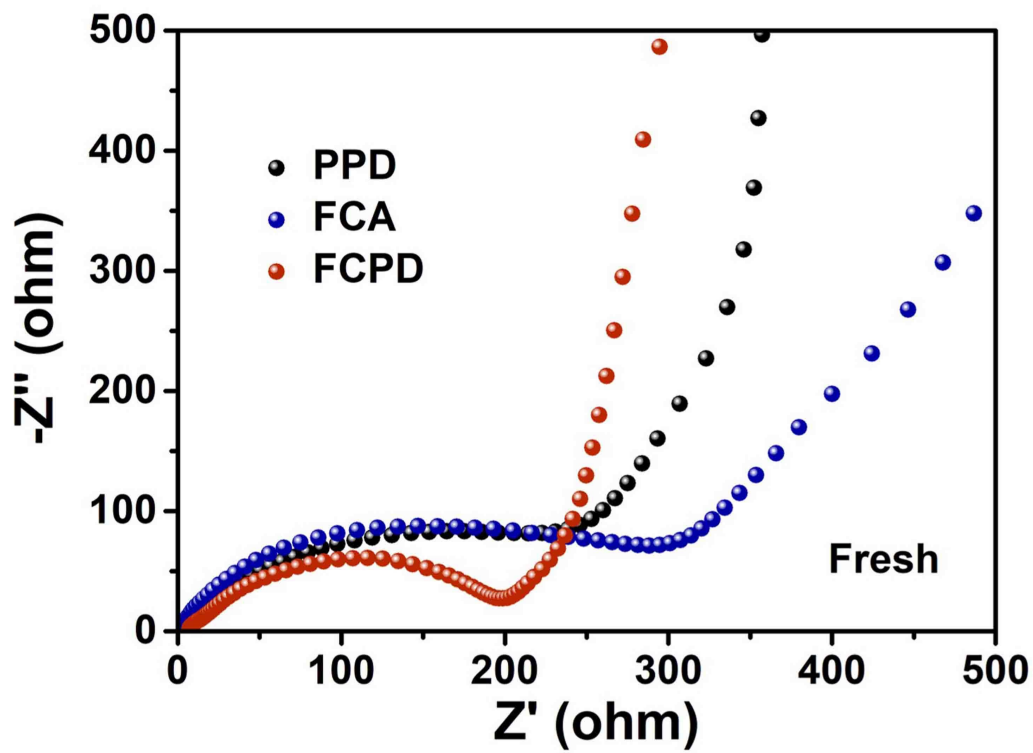

Figure S4. EIS plots of PPD, FCA, and FCPD cathodes.

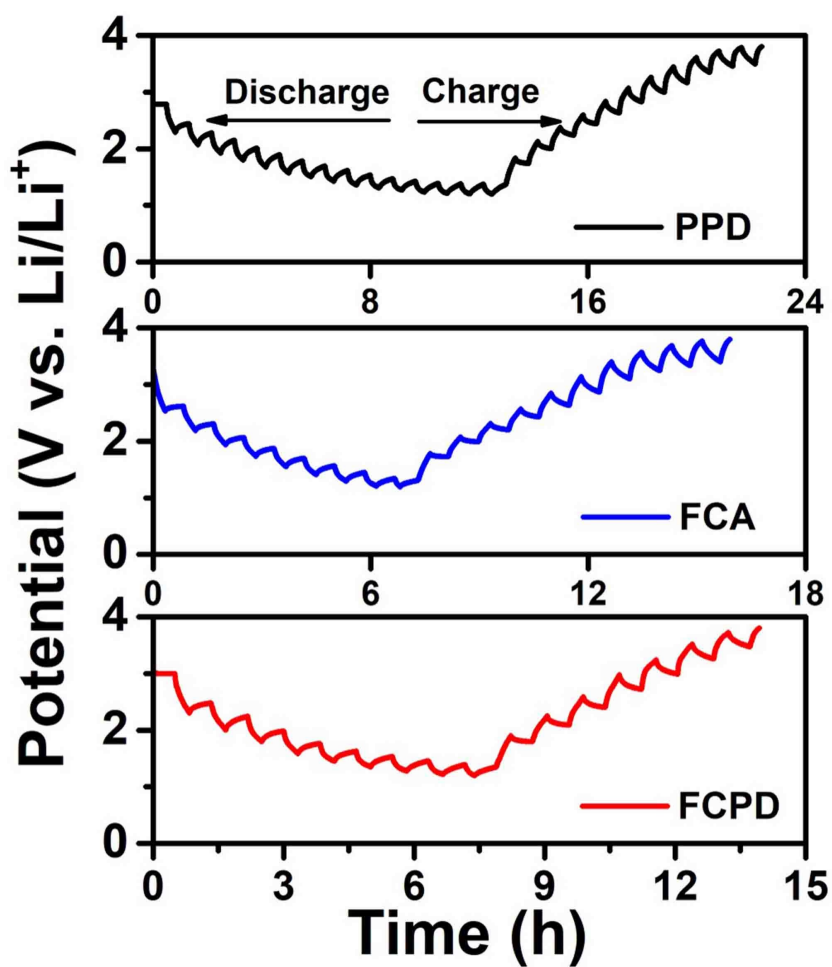

**Figure S5.** The GITT curves of PPD, FCA, and FCPD cathodes during the charging/discharging processes.

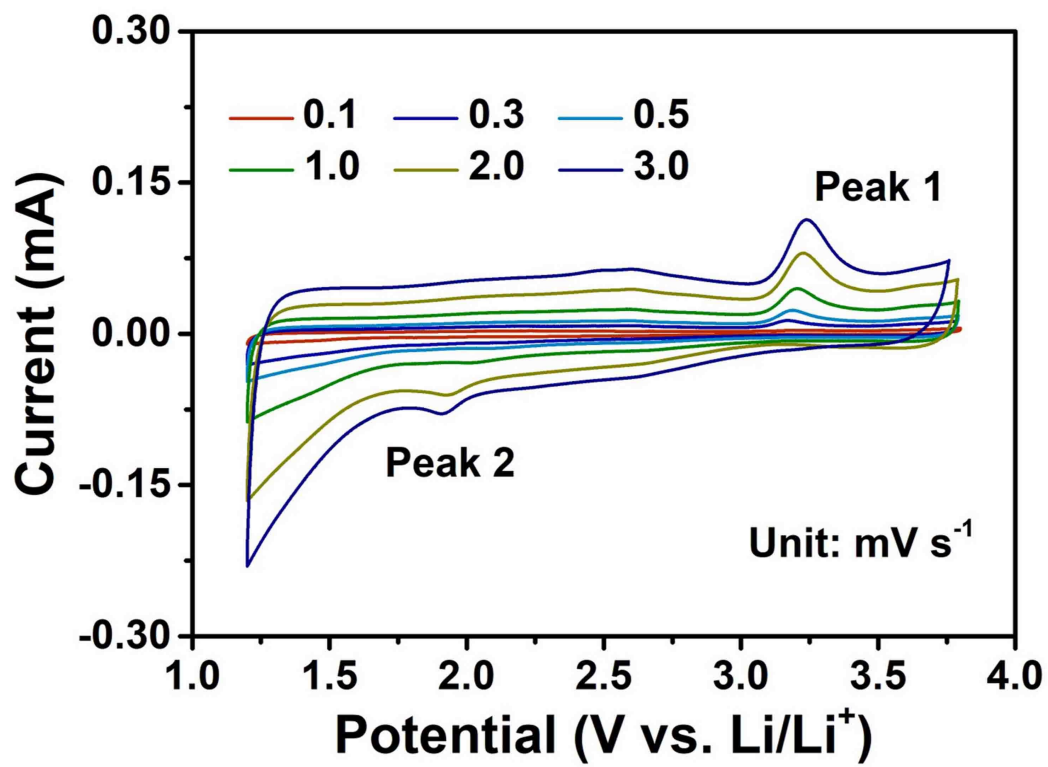

Figure S6. CV curves of the FCPD cathode at various scan rates.

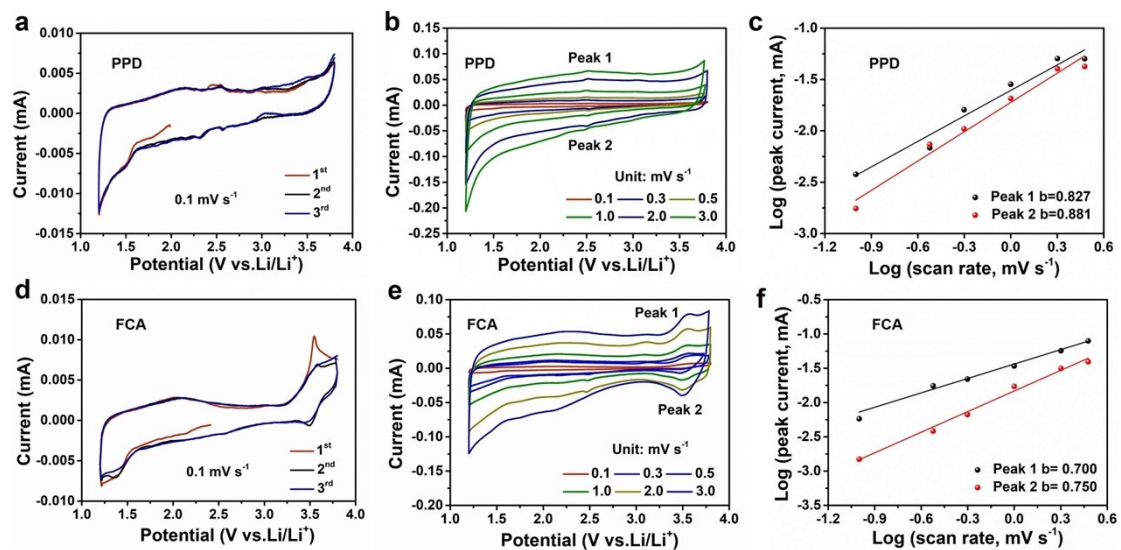

**Figure S7.** CV curves at  $0.1 \text{ mV s}^{-1}$ , CV curves at various scan rates ranging from 0.1 to  $3.0 \text{ mV s}^{-1}$ , and corresponding relationship between  $\log(i)$  and  $\log(v)$  of PPD and FCA cathode.



**Table S1.** Comparison of the rate behaviors of the FCPD electrode with other organic electrodes.

| <b>Samples</b> | <b>Capacity (mAh g<sup>-1</sup>) @ Rate (mA g<sup>-1</sup>)</b> | <b>Ref.</b>      |
|----------------|-----------------------------------------------------------------|------------------|
| PQANP-3        | ~175 @ 100, ~120 @ 5000                                         | 1                |
| P(PTO-TT)      | ~175 @ 100, ~90 @ 5000                                          | 2                |
| E-TP-COF       | ~110 @ 200, ~30 @ 2000                                          | 3                |
| TCTA           | ~95 @ 100, ~70 @ 5000                                           | 4                |
| BQbTPL         | ~150 @ 100, ~95.8 @ 1000                                        | 5                |
| DPTTO          | ~143 @ 100, ~63 @ 2000                                          | 6                |
| FCPD           | ~250 @ 100, ~151 @ 5000                                         | <b>This work</b> |

## REFERENCES

1. Y. Shi, J. Yang, J. Yang, Z. Wang, Z. Chen and Y. Xu, *Advanced Functional Materials*, 2022, **32**, 2111307.
2. X.-H. Chen, H. Lu, Z. Wu, H. Wang, S. Zhang, S. Mei, G. Long, Q. Zhang and C.-J. Yao, *Journal of Materials Chemistry A*, 2023, **11**, 77-83.
3. G. Zhao, H. Li, Z. Gao, L. Xu, Z. Mei, S. Cai, T. Liu, X. Yang, H. Guo and X. Sun, *Advanced Functional Materials*, 2021, **31**, 2101019.
4. C. Zhao, Z. Chen, W. Wang, P. Xiong, B. Li, M. Li, J. Yang and Y. Xu, *Angewandte Chemie International Edition*, 2020, **59**, 11992-11998.
5. Z. Ouyang, D. Tranca, Y. Zhao, Z. Chen, X. Fu, J. Zhu, G. Zhai, C. Ke, E. Kymakis and X. Zhuang, *ACS Applied Materials & Interfaces*, 2021, **13**, 9064-9073.
6. B. Zhang, X. Yang, B. He, Q. Wang, Z. Liu, D. Yu and G. He, *Journal of Materials Chemistry A*, 2021, **9**, 14444-14450.
